# Supplementary material for: Mutations in SELENBP1, encoding a novel human methanethiol oxidase, cause extraoral halitosis
Source: Springer Nature journal article supplement (doi:10.1038/s41588-017-0006-7), 2017-12-15

figure 4C

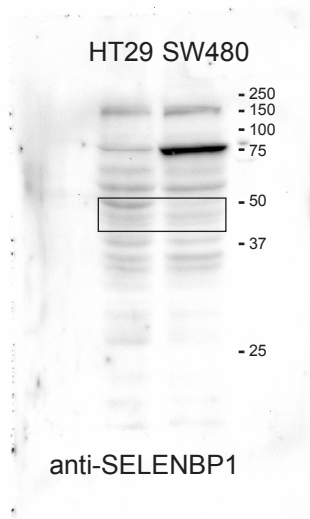

Original blots,

cropped areas used in the published figures are indicated by boxes.

figure 4D

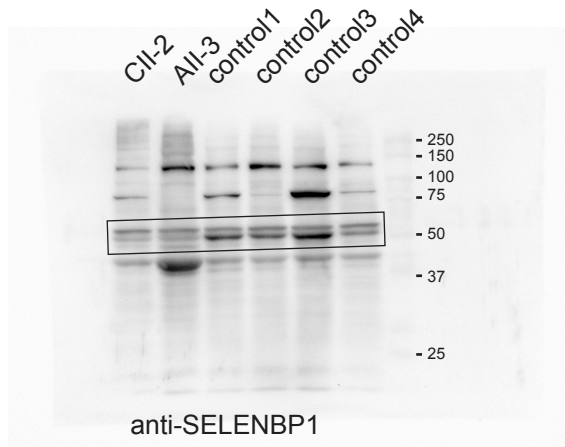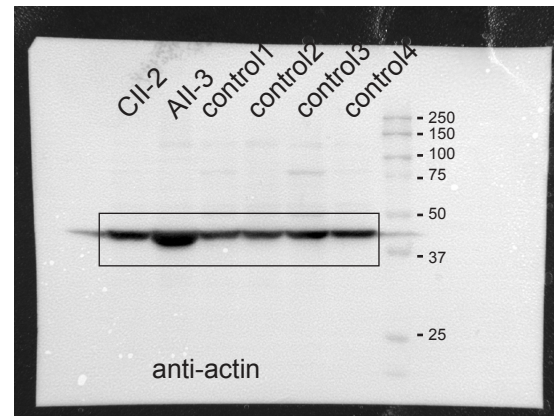

figure 4F

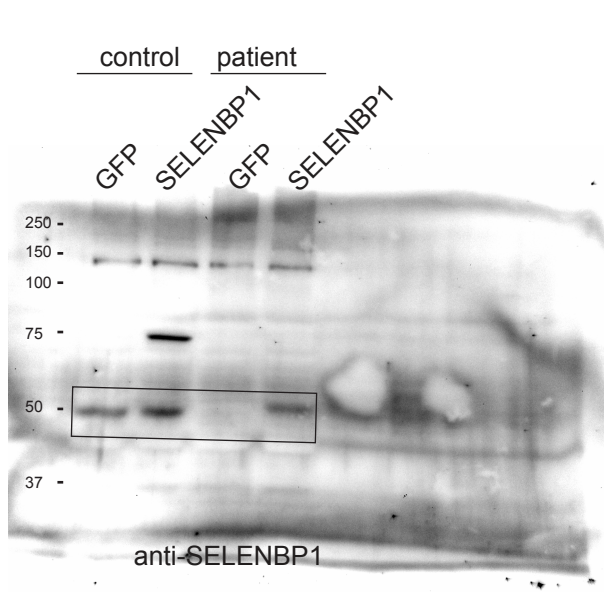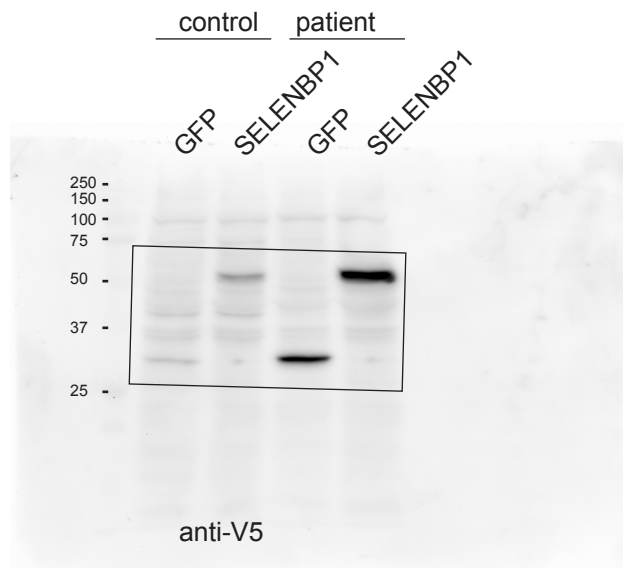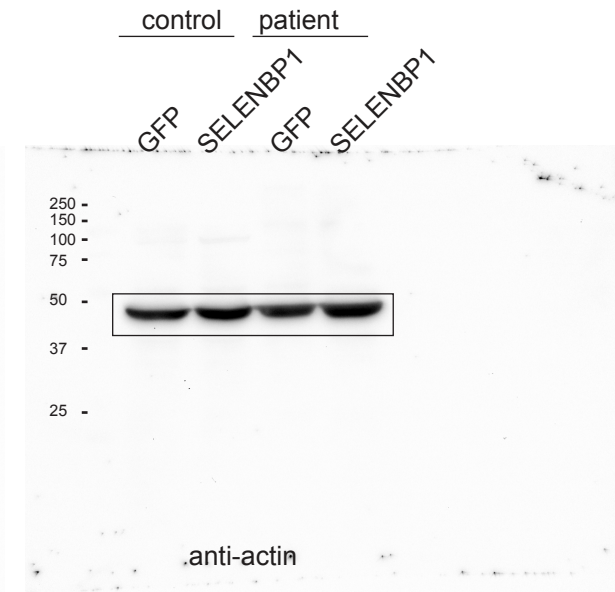

Supplement: 41588_2017_6_MOESM4_ESM.pdf [file 41588_2017_6_MOESM4_ESM.pdf]
